# Supplementary material
Source: publisher figshare collection journal article supplement (https://tandf.figshare.com/articles/dataset/_/5558626)
Supplement: Supplementary file 2 [file 1]

Archive with 5 entries (5 files):
- tbbb_a_1394813_sm4145.pdf
- tbbb_a_1394813_sm4144.pdf
- tbbb_a_1394813_sm4143.pdf
- tbbb_a_1394813_sm4142.pdf
- tbbb_a_1394813_sm4141.pdf
