# Supplementary material
Source: publisher figshare collection journal article supplement (https://tandf.figshare.com/articles/dataset/_/5558626)
Supplement: Supplementary file 2 [file 1 › tbbb_a_1394813_sm4141.pdf]

Supplement 1 Structures of four non-core-fucosylated N-glycans attached to anti-HER2 mAbs used in our previous paper [15].

| Symbol | Structure                                                                                                                                                                                                                                                                                                                                                                                                                                                                                                                                   |
|--------|---------------------------------------------------------------------------------------------------------------------------------------------------------------------------------------------------------------------------------------------------------------------------------------------------------------------------------------------------------------------------------------------------------------------------------------------------------------------------------------------------------------------------------------------|
| A2     | <div> <math display="block">\begin{array}{l} \text{Neu5Ac}\alpha 2 \rightarrow 6\text{Gal}\beta 1 \rightarrow 4\text{GlcNAc}\beta 1 \rightarrow 2\text{Man}\alpha 1 \searrow 6 \\ \text{Neu5Ac}\alpha 2 \rightarrow 6\text{Gal}\beta 1 \rightarrow 4\text{GlcNAc}\beta 1 \rightarrow 2\text{Man}\alpha 1 \nearrow 3 \end{array} \begin{array}{l} \text{Man}\beta 1 \rightarrow 4\text{GlcNAc}\beta 1 \rightarrow 4\text{GlcNAc} \\ \text{Man}\beta 1 \rightarrow 4\text{GlcNAc}\beta 1 \rightarrow 4\text{GlcNAc} \end{array}</math> </div> |
| G2     | <div> <math display="block">\begin{array}{l} \text{Gal}\beta 1 \rightarrow 4\text{GlcNAc}\beta 1 \rightarrow 2\text{Man}\alpha 1 \searrow 6 \\ \text{Gal}\beta 1 \rightarrow 4\text{GlcNAc}\beta 1 \rightarrow 2\text{Man}\alpha 1 \nearrow 3 \end{array} \begin{array}{l} \text{Man}\beta 1 \rightarrow 4\text{GlcNAc}\beta 1 \rightarrow 4\text{GlcNAc} \\ \text{Man}\beta 1 \rightarrow 4\text{GlcNAc}\beta 1 \rightarrow 4\text{GlcNAc} \end{array}</math> </div>                                                                       |
| G0     | <div> <math display="block">\begin{array}{l} \text{GlcNAc}\beta 1 \rightarrow 2\text{Man}\alpha 1 \searrow 6 \\ \text{GlcNAc}\beta 1 \rightarrow 2\text{Man}\alpha 1 \nearrow 3 \end{array} \begin{array}{l} \text{Man}\beta 1 \rightarrow 4\text{GlcNAc}\beta 1 \rightarrow 4\text{GlcNAc} \\ \text{Man}\beta 1 \rightarrow 4\text{GlcNAc}\beta 1 \rightarrow 4\text{GlcNAc} \end{array}</math> </div>                                                                                                                                     |
| M3     | <div> <math display="block">\begin{array}{l} \text{Man}\alpha 1 \searrow 6 \\ \text{Man}\alpha 1 \nearrow 3 \end{array} \begin{array}{l} \text{Man}\beta 1 \rightarrow 4\text{GlcNAc}\beta 1 \rightarrow 4\text{GlcNAc} \\ \text{Man}\beta 1 \rightarrow 4\text{GlcNAc}\beta 1 \rightarrow 4\text{GlcNAc} \end{array}</math> </div>                                                                                                                                                                                                         |
