# Supplementary material
Source: publisher figshare collection journal article supplement (https://tandf.figshare.com/articles/dataset/_/5558626)
Supplement: Supplementary file 2 [file 1 › tbbb_a_1394813_sm4142.pdf]

Supplement 2 Structures and proportions of N-glycans attached to anti-HER2 mAbs produced in CHO cells as determined by MALDI-TOF MS analysis.

| Symbol | Structure                                                                                                                                                                                                                                                                                                                                                                       | Ratio (%) |
|--------|---------------------------------------------------------------------------------------------------------------------------------------------------------------------------------------------------------------------------------------------------------------------------------------------------------------------------------------------------------------------------------|-----------|
| G0F    | $\begin{array}{c} \text{GlcNAc}\beta 1 \rightarrow 2\text{Man}\alpha 1 \xrightarrow{6} \text{Man}\beta 1 \rightarrow 4\text{GlcNAc}\beta 1 \rightarrow 4\text{GlcNAc} \\ \text{GlcNAc}\beta 1 \rightarrow 2\text{Man}\alpha 1 \xrightarrow{3} \end{array}$ $\begin{array}{c} \text{Fuc}\alpha 1 \\ \downarrow \\ 6 \end{array}$                                                 | 42.0      |
| G1F    | $\text{Gal}\beta 1 \rightarrow \left\{ \begin{array}{l} 4\text{GlcNAc}\beta 1 \rightarrow 2\text{Man}\alpha 1 \xrightarrow{6} \\ 4\text{GlcNAc}\beta 1 \rightarrow 2\text{Man}\alpha 1 \xrightarrow{3} \end{array} \right. \text{Man}\beta 1 \rightarrow 4\text{GlcNAc}\beta 1 \rightarrow 4\text{GlcNAc}$ $\begin{array}{c} \text{Fuc}\alpha 1 \\ \downarrow \\ 6 \end{array}$ | 34.1      |
| G2F    | $\text{Gal}\beta 1 \rightarrow 4\text{GlcNAc}\beta 1 \rightarrow 2\text{Man}\alpha 1 \xrightarrow{6} \text{Man}\beta 1 \rightarrow 4\text{GlcNAc}\beta 1 \rightarrow 4\text{GlcNAc}$ $\text{Gal}\beta 1 \rightarrow 4\text{GlcNAc}\beta 1 \rightarrow 2\text{Man}\alpha 1 \xrightarrow{3}$ $\begin{array}{c} \text{Fuc}\alpha 1 \\ \downarrow \\ 6 \end{array}$                 | 5.4       |
| G1     | $\text{Gal}\beta 1 \rightarrow \left\{ \begin{array}{l} 4\text{GlcNAc}\beta 1 \rightarrow 2\text{Man}\alpha 1 \xrightarrow{6} \\ 4\text{GlcNAc}\beta 1 \rightarrow 2\text{Man}\alpha 1 \xrightarrow{3} \end{array} \right. \text{Man}\beta 1 \rightarrow 4\text{GlcNAc}\beta 1 \rightarrow 4\text{GlcNAc}$                                                                      | 4.7       |
| G0     | $\text{GlcNAc}\beta 1 \rightarrow 2\text{Man}\alpha 1 \xrightarrow{6} \text{Man}\beta 1 \rightarrow 4\text{GlcNAc}\beta 1 \rightarrow 4\text{GlcNAc}$ $\text{GlcNAc}\beta 1 \rightarrow 2\text{Man}\alpha 1 \xrightarrow{3}$                                                                                                                                                    | 4.4       |
| GN1F   | $\text{GlcNAc}\beta 1 \rightarrow \left\{ \begin{array}{l} 2\text{Man}\alpha 1 \xrightarrow{6} \\ 2\text{Man}\alpha 1 \xrightarrow{3} \end{array} \right. \text{Man}\beta 1 \rightarrow 4\text{GlcNAc}\beta 1 \rightarrow 4\text{GlcNAc}$ $\begin{array}{c} \text{Fuc}\alpha 1 \\ \downarrow \\ 6 \end{array}$                                                                  | 2.9       |
| G2     | $\text{Gal}\beta 1 \rightarrow 4\text{GlcNAc}\beta 1 \rightarrow 2\text{Man}\alpha 1 \xrightarrow{6} \text{Man}\beta 1 \rightarrow 4\text{GlcNAc}\beta 1 \rightarrow 4\text{GlcNAc}$ $\text{Gal}\beta 1 \rightarrow 4\text{GlcNAc}\beta 1 \rightarrow 2\text{Man}\alpha 1 \xrightarrow{3}$                                                                                      | 2.1       |
| M5     | $\begin{array}{c} \text{Man}\alpha 1 \xrightarrow{6} \text{Man}\alpha 1 \xrightarrow{6} \text{Man}\beta 1 \rightarrow 4\text{GlcNAc}\beta 1 \rightarrow 4\text{GlcNAc} \\ \text{Man}\alpha 1 \xrightarrow{3} \text{Man}\alpha 1 \xrightarrow{3} \end{array}$                                                                                                                    | 1.9       |
| G1GN1F | $\text{Gal}\beta 1 \rightarrow 4\text{GlcNAc}\beta 1 \rightarrow \left\{ \begin{array}{l} 2\text{Man}\alpha 1 \xrightarrow{6} \\ 2\text{Man}\alpha 1 \xrightarrow{3} \end{array} \right. \text{Man}\beta 1 \rightarrow 4\text{GlcNAc}\beta 1 \rightarrow 4\text{GlcNAc}$ $\begin{array}{c} \text{Fuc}\alpha 1 \\ \downarrow \\ 6 \end{array}$                                   | 1.6       |
| GN1    | $\text{GlcNAc}\beta 1 \rightarrow \left\{ \begin{array}{l} 2\text{Man}\alpha 1 \xrightarrow{6} \\ 2\text{Man}\alpha 1 \xrightarrow{3} \end{array} \right. \text{Man}\beta 1 \rightarrow 4\text{GlcNAc}\beta 1 \rightarrow 4\text{GlcNAc}$                                                                                                                                       | 0.9       |
