# Supplementary material
Source: publisher figshare collection journal article supplement (https://tandf.figshare.com/articles/dataset/_/5558626)
Supplement: Supplementary file 2 [file 1 › tbbb_a_1394813_sm4143.pdf]

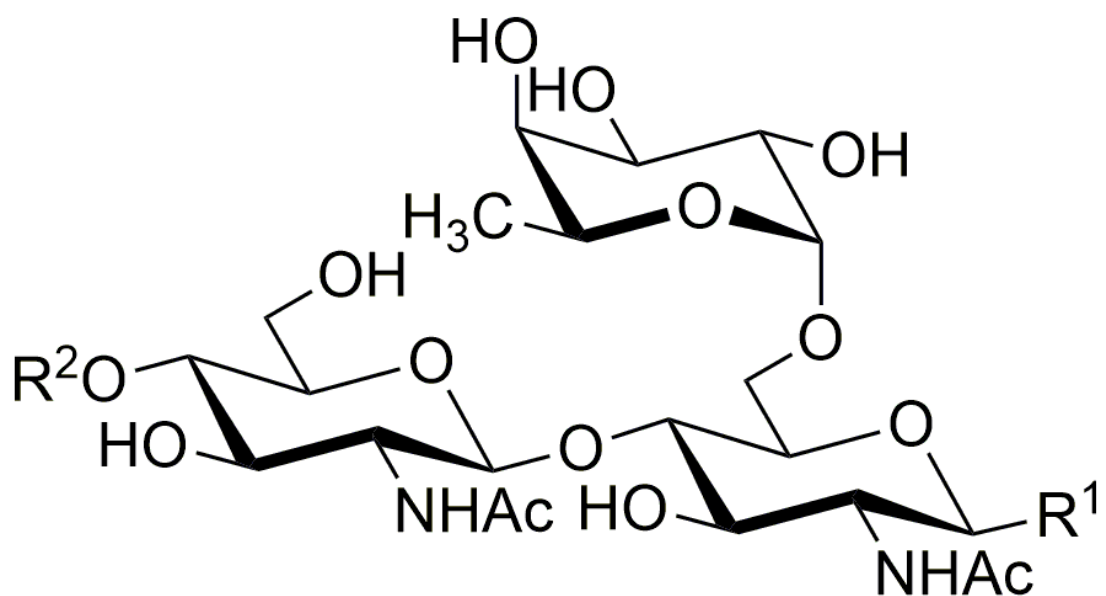

Supplement 3 A chemical structure of fucose attached via  $\alpha$ -1,6-linkage to chitobiose present in N-glycan core structure. R<sup>1</sup> and R<sup>2</sup> indicate Asn-peptide and glycans, respectively.
