# Supplementary material
Source: publisher figshare collection journal article supplement (https://tandf.figshare.com/articles/dataset/_/5558626)
Supplement: Supplementary file 2 [file 1 › tbbb_a_1394813_sm4144.pdf]

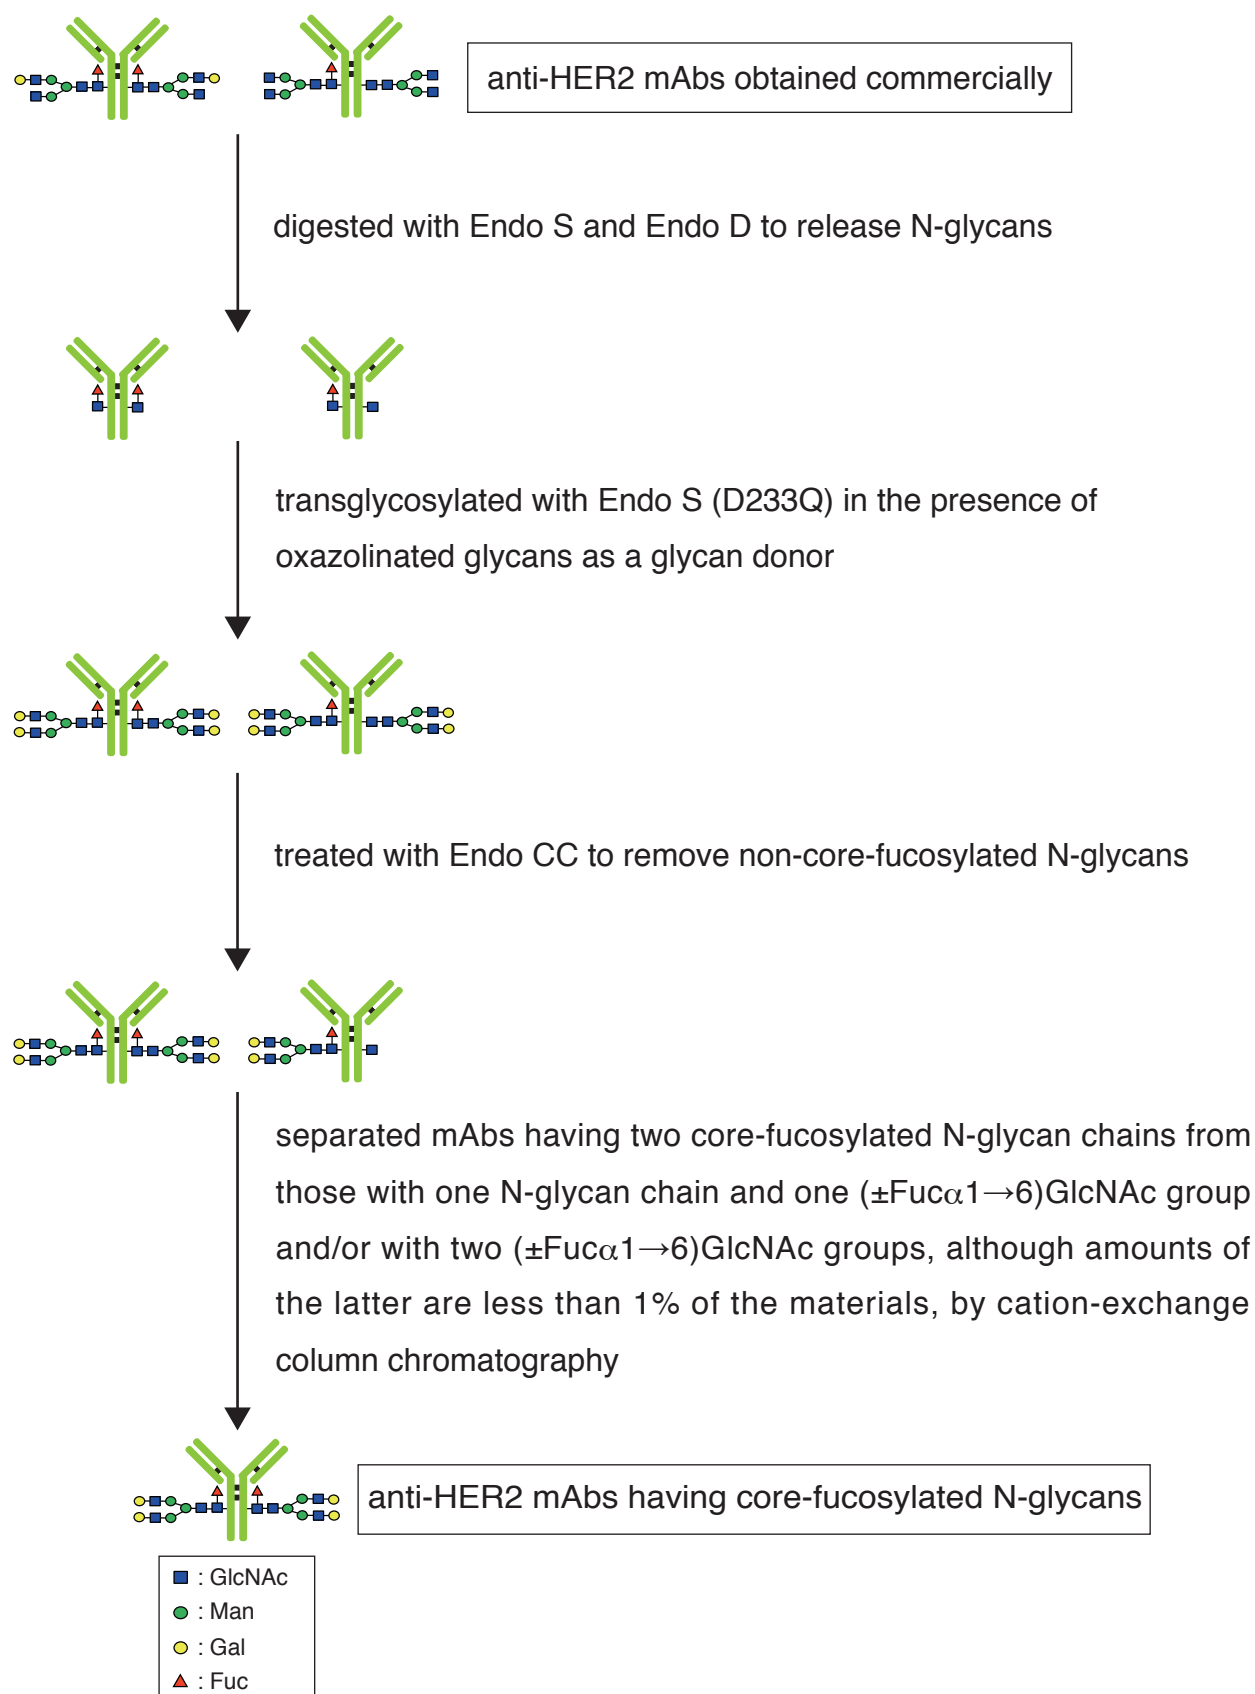

Supplement 4 A schematic illustration of preparation procedure of mAbs having core-fucosylated N-glycans with respective structures. The illustration shows the case using an oxazolinated glycan with the G2 structure as a donor.
